# Supplementary material for: Surface modifications of boron nitride nanosheets for poly(vinylidene fluoride) based film capacitors: advantages of edge-hydroxylation
Source: Royal Society of Chemistry journal article supplement (doi:10.1039/c9ta00616h), 2019-01-01
Supplement: c9ta00616h1.pdf [file c9ta00616h1.pdf]

## Supporting Information

### Surface Modifications of Boron Nitride Nanosheets for Poly(vinylidene Fluoride) Based Film Capacitor: Artful Virtue of Edge-Hydroxylation

Lingyu Wu<sup>†a</sup>, Kai Wu<sup>†a</sup>, Chuxin Lei<sup>a</sup>, Dingyao Liu<sup>a</sup>, Rongni Du<sup>a</sup>, Feng Chen<sup>\*a</sup>, Qiang Fu<sup>\*</sup>

<sup>a</sup> College of Polymer Science and Engineering, State Key Laboratory of Polymer Materials Engineering, Sichuan University, Chengdu 610065, China

<sup>†</sup> These authors contributed equally to this work

E-mail: fengchen@scu.edu.cn (F. Chen); qiangfu@scu.edu.cn (Q. Fu)

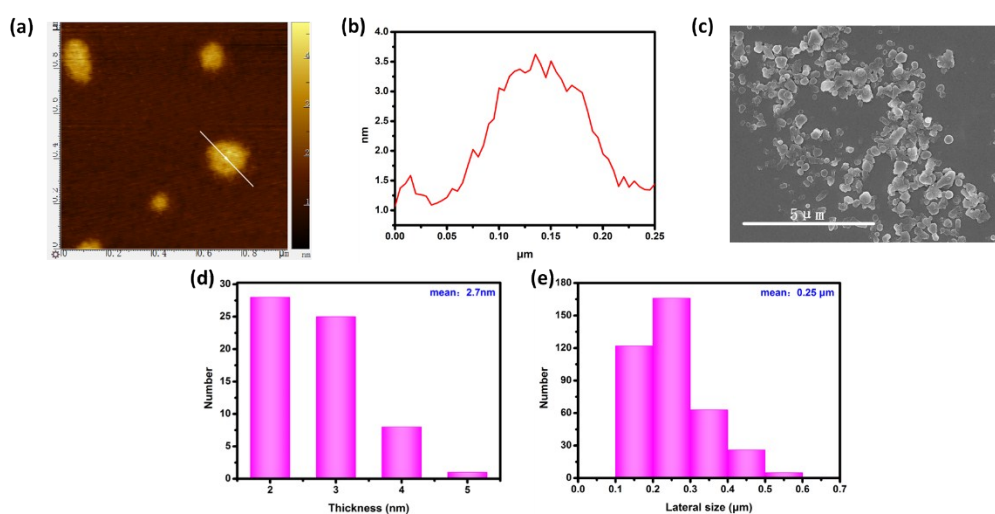

Fig. S1 (a) AFM image of BNNSs and (b) the corresponding height information for BNNSs. (c) SEM image of BNNSs. (d) Statistical analysis on the thickness of a sheet of BNNSs. (e) Statistical analysis on the lateral size of a set of BNNSs.

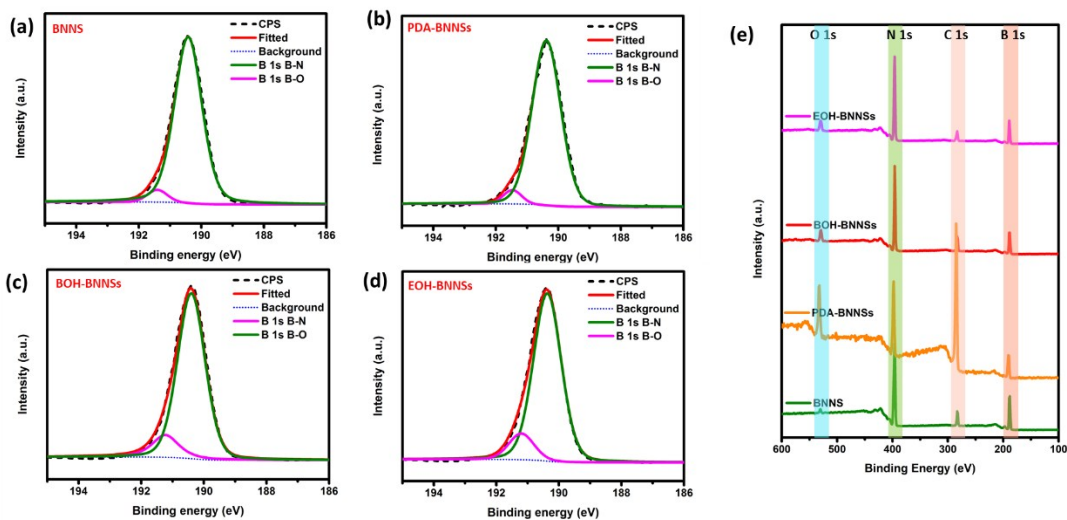

Fig. S2 B1s core level of (a) BNNs, (b) PDA-BNNs, (c) BOH-BNNs and (d) EOH-BNNs; (e) XPS wide spectrum of BNNs and f-BNNs.

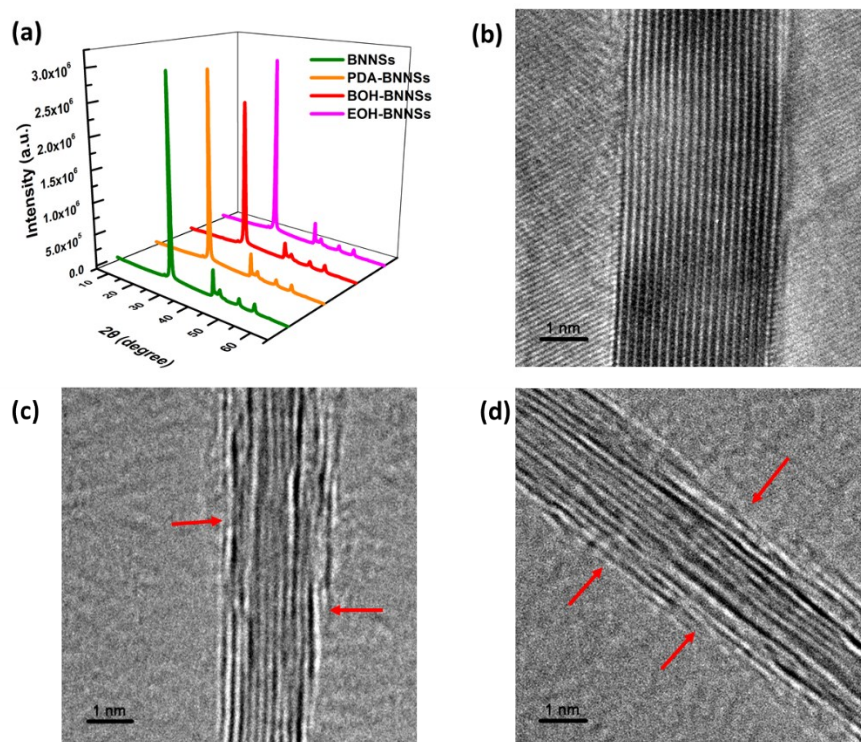

Fig. S3 (a) XRD spectra of BNNs and f-BNNs. HRTEM images at the edge of (b) BNNs, (c) BOH-BNNs and (d) EOH-BNNs.

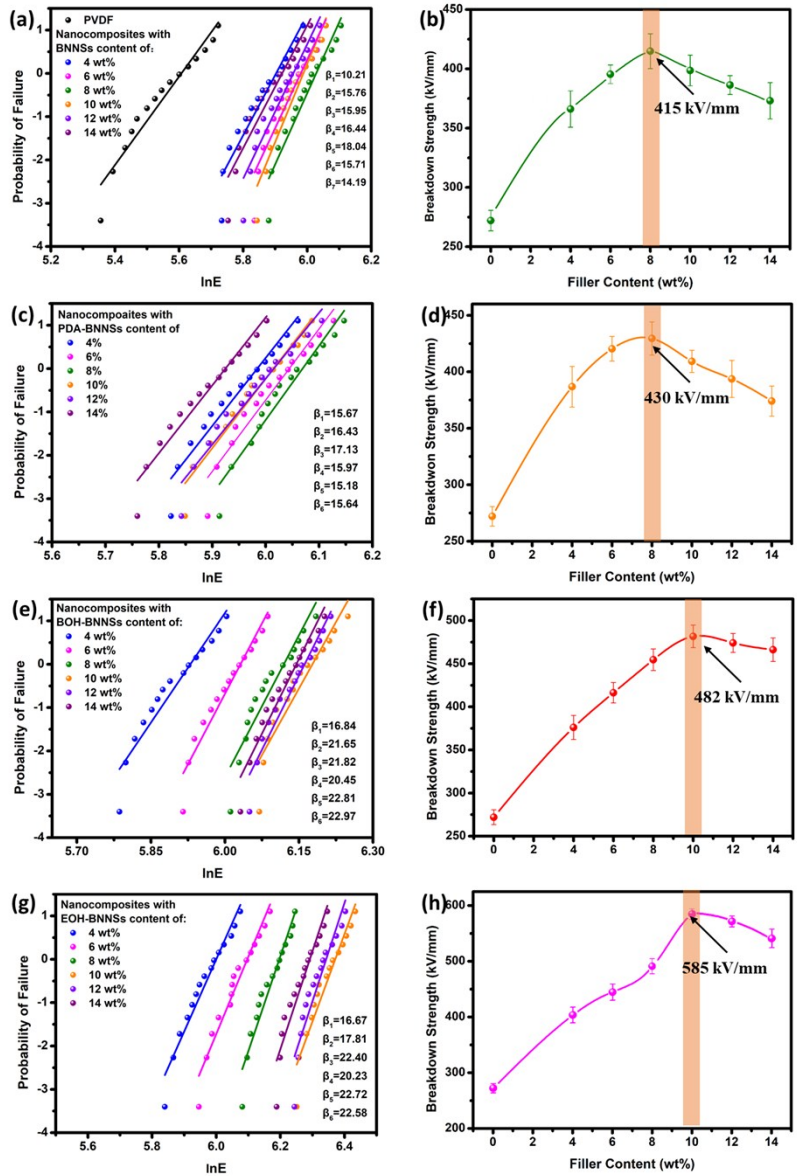

Fig. S4 (a, c, e, g) Weibull plots for PVDF/BNNs (PVDF/f-BNNs) nanocomposites with various BNNs (f-BNNs) contents. (b, d, f, h) Weibull breakdown strength (scale parameter) of PVDF/BNNs (PVDF/f-BNNs) nanocomposites as functions of BNNs (f-BNNs) fraction.

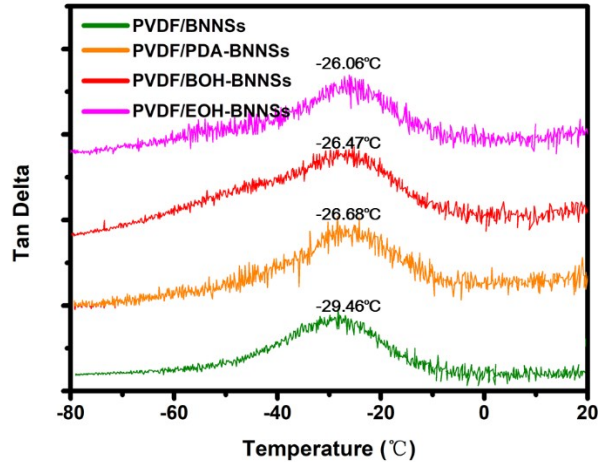

Fig. S5 Temperature dependence of tan delta of PVDF/10 wt% BNNs and PVDF/10 wt% f-BNNs nanocomposites.

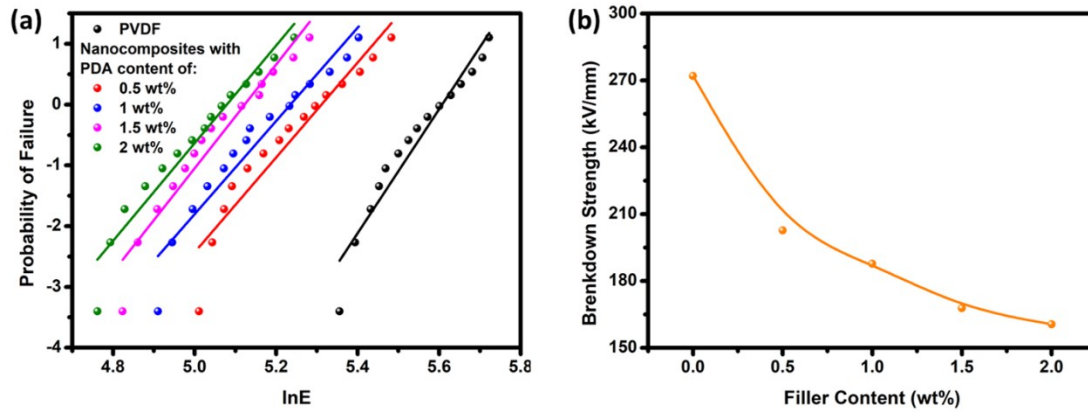

Fig. S6 (a) Weibull plots for PVDF/PDA nanocomposites with various PDA content. (b) Weibull breakdown strength of PVDF/PDA nanocomposites as functions of PDA fraction.
